# Supplementary material
Source: PubMed Central journal article supplement (PMC5004661)
Supplement: ASN.2015091018SupplementaryData.pdf [file ASN.2015091018SupplementaryData.pdf]

# Renal Function Profile in White Kidney Donors: The First 4 Decades

## Supplemental Material Index

|                                                                                                                 |                |
|-----------------------------------------------------------------------------------------------------------------|----------------|
| Relationship between baseline features of postdonation eGFR at 20, 30, and 40 years.....                        | Page 2         |
| Figure S1a. Donation systolic blood pressure and postdonation eGFR                                              |                |
| Figure S1b. Donation diastolic blood pressure and postdonation eGFR                                             |                |
| Figure S1c. Donation BMI and postdonation eGFR                                                                  |                |
| Figure S1d. Donation glucose and postdonation eGFR                                                              |                |
| <br>                                                                                                            |                |
| Risk Calculator for White Donors.....                                                                           | excel document |
| <br>                                                                                                            |                |
| Outcomes in White and non-White donors.....                                                                     | Page 7         |
| Table S1a. Characteristics at donation, entire cohort (n = 4,187)                                               |                |
| Table S1b. Risk factors for adverse clinical outcomes                                                           |                |
| Table S1c. Cumulative incidence of ESRD (per 10,000)                                                            |                |
| Table S1d. Postdonation events and risk of death, proteinuria, and eGFR < 30 ml/min/1.73 m <sup>2</sup> or ESRD |                |
| Figure S2a. Risk calculator sample output donor #1                                                              |                |
| Figure S2b. Risk calculator sample output donor #2                                                              |                |
| <br>                                                                                                            |                |
| Kidney donor follow-up survey.....                                                                              | Page 12        |
| <br>                                                                                                            |                |
| Table S2. Characteristics at donation: development and validation cohorts.....                                  | Page 13        |

**Relationship between baseline features of postdonation eGFR at 20, 30, and 40 years**

**Figure S1a.** Relationship between systolic blood pressure at donation and eGFR at 20, 30, 40 years postdonation

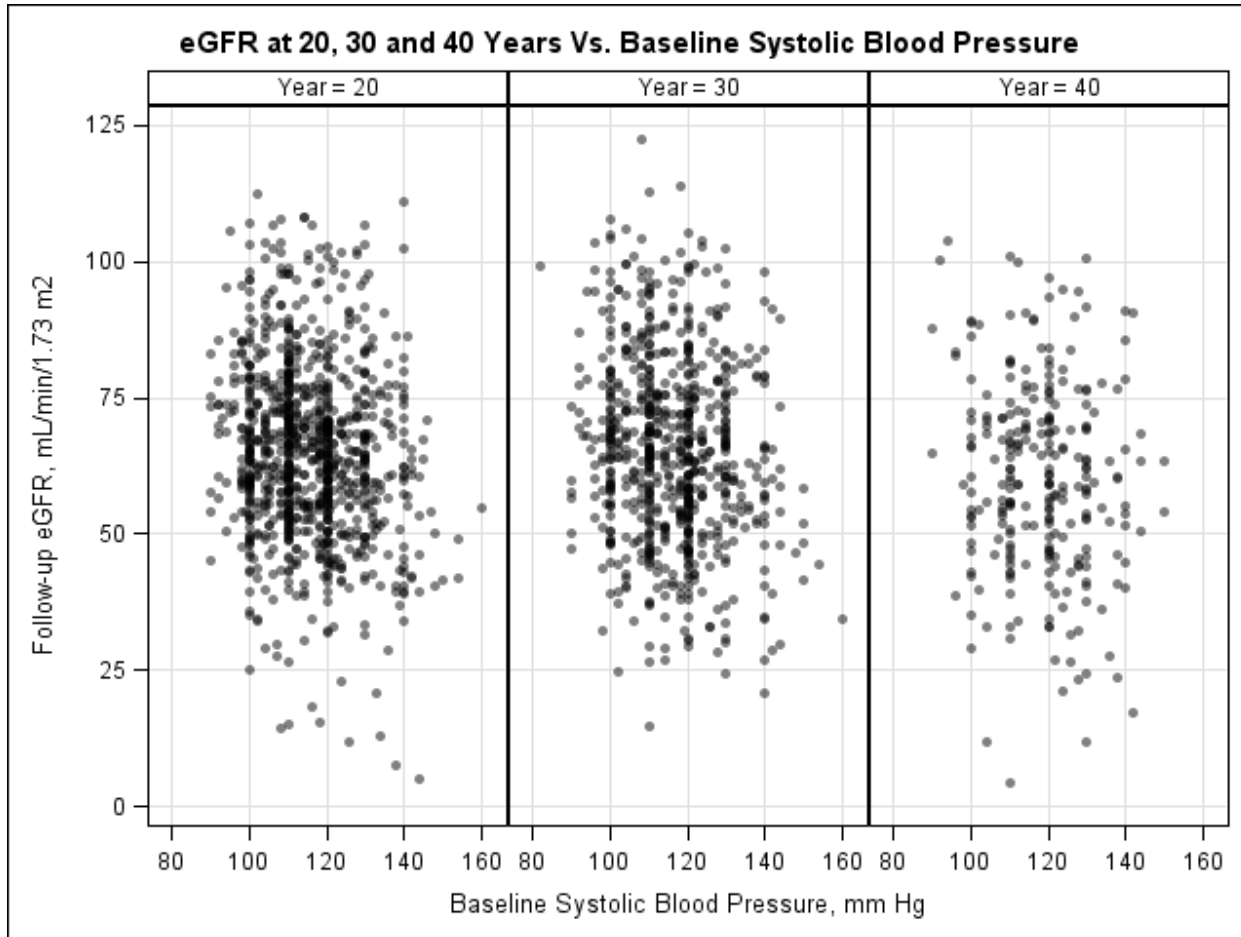

**Figure S1b.** Relationship between diastolic blood pressure at donation and eGFR at 20, 30, 40 years postdonation

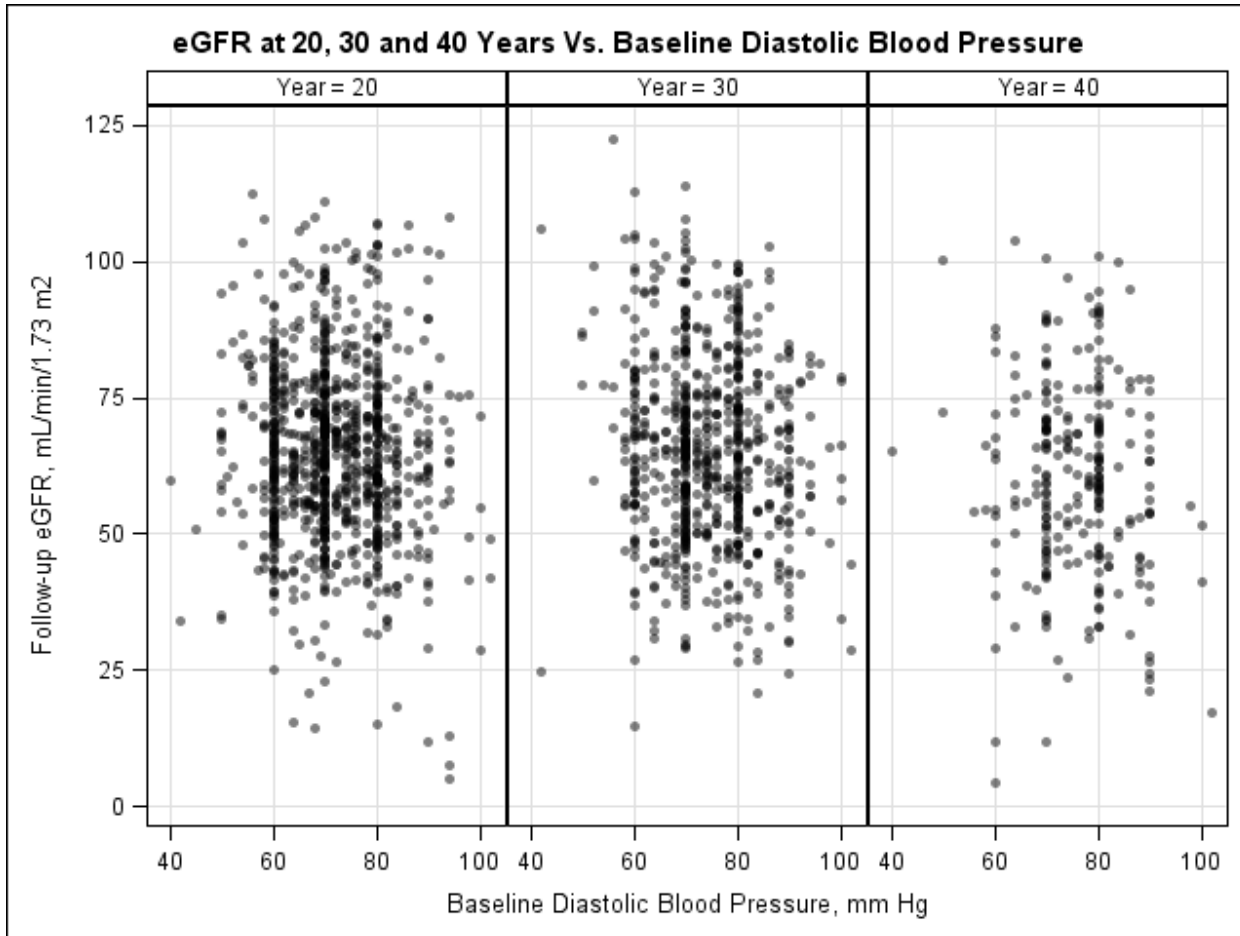

**Figure S1c.** Relationship between body mass index at donation and eGFR at 20, 30, 40 years postdonation

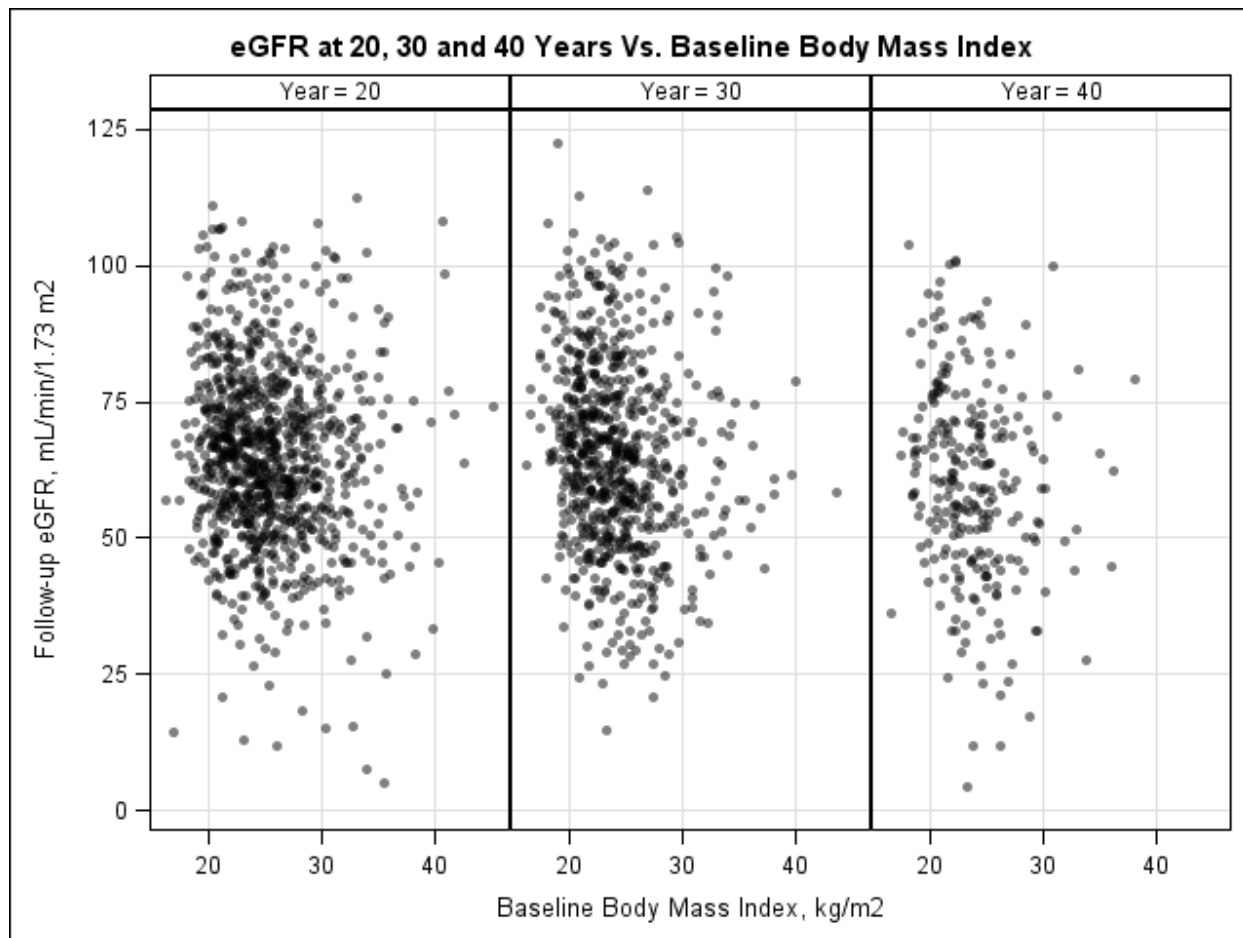

**Figure S1d.** Relationship between glucose at donation and eGFR at 20, 30, 40 years Postdonation

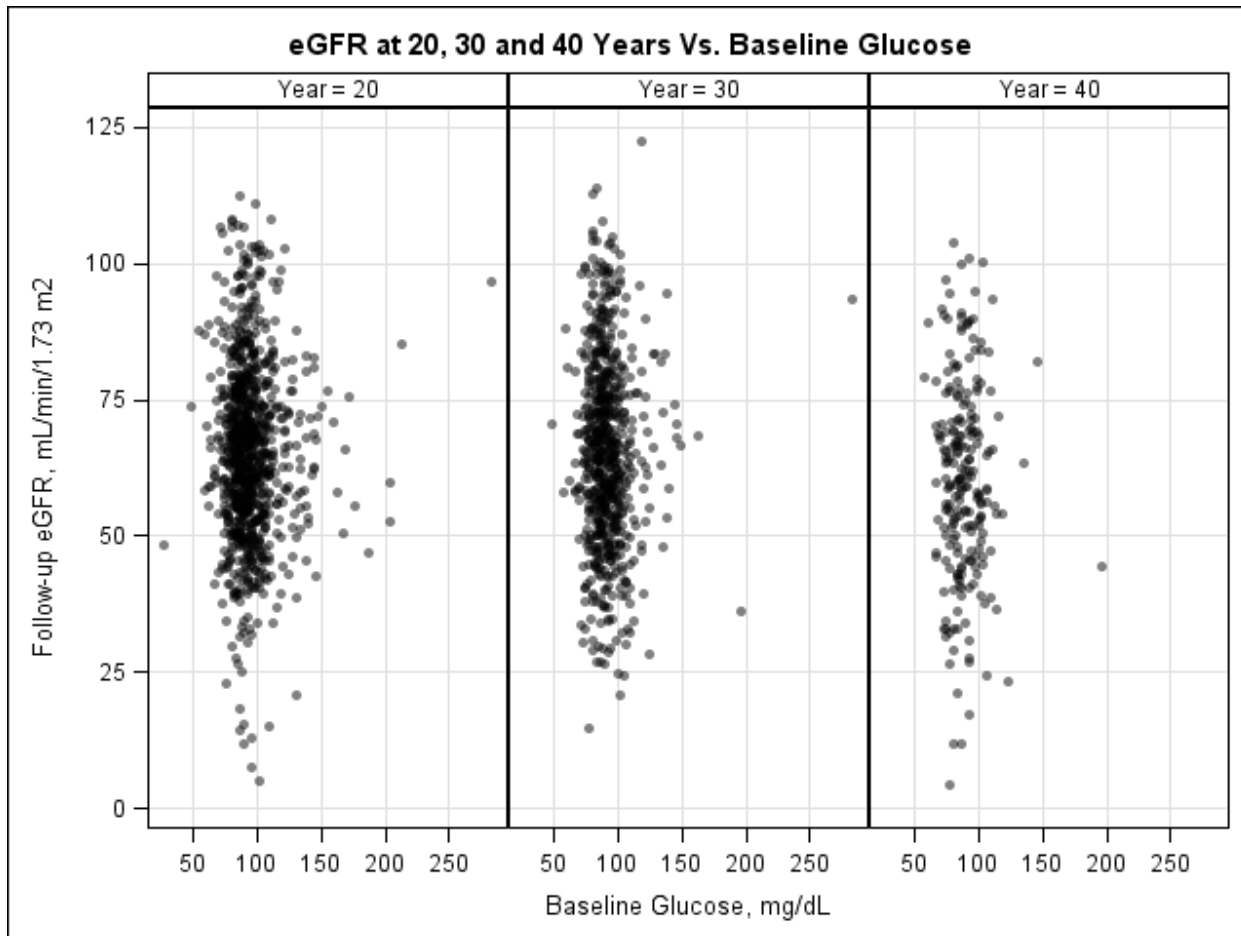

**Risk Calculator for White Donors (separate excel attachment)**

## Outcomes in White and non-White donors

**Table S1a.** Characteristics at donation, entire cohort (n = 4,187)

| Variable                           | % or mean (SD) |
|------------------------------------|----------------|
| Age, years                         | 39.0 (11.6)    |
| Related to recipient               | 80.6           |
| Female gender                      | 56.8           |
| Smoker                             | 31.0           |
| Body mass index, kg/m <sup>2</sup> | 25.9 (4.4)     |
| Serum creatinine, mg/dL            | 0.9 (0.2)      |
| eGFR, ml/min/1.73 m <sup>2</sup>   | 93.5 (16.5)    |
| Serum glucose, mg/dL               | 93.4 (14.8)    |
| Systolic blood pressure, mm Hg     | 119.9 (13.2)   |
| Diastolic blood pressure, mm Hg    | 73.4 (10.0)    |
| Hemoglobin, g/dL                   | 14.1 (1.3)     |
| Race                               |                |
| <i>White</i>                       | 94.5           |
| <i>American Indian</i>             | 1.8            |
| <i>Asian</i>                       | 1.2            |
| <i>Black</i>                       | 2.5            |
| Recipient kidney disease           |                |
| <i>Glomerulonephritis</i>          | 24.5           |
| <i>Type 2 diabetes</i>             | 4.1            |
| <i>Other</i>                       | 71.4           |

eGFR = estimated glomerular filtration rate; SD = standard deviation

**Table S1b.** Risk factors for adverse clinical outcomes

|                                      | Risk factor               | Hazard ratio     | <i>P</i> |
|--------------------------------------|---------------------------|------------------|----------|
| Proteinuria                          | Body mass index*          | 1.09 (1.06-1.12) | < 0.001  |
|                                      | Male gender               | 1.48 (1.14-1.93) | < 0.001  |
|                                      | White race                | 0.52 (0.31-0.86) | 0.01     |
|                                      | Related to recipient      | 0.60 (0.37-0.97) | 0.04     |
| eGFR < 60 ml/min/1.73 m <sup>2</sup> | Older age at donation*    | 1.05 (1.04-1.06) | < 0.001  |
|                                      | Body mass index*          | 1.03 (1.01-1.04) | < 0.001  |
|                                      | Systolic blood pressure*  | 1.01 (1.00-1.02) | < 0.001  |
|                                      | Diastolic blood pressure* | 0.99 (0.98-1.00) | < 0.001  |
|                                      | White race                | 0.73 (0.54-0.98) | 0.04     |
|                                      | Type 2 diabetes           | 1.56 (1.18-2.07) | < 0.001  |
|                                      | Related to recipient      | 0.56 (0.48-0.65) | < 0.001  |
|                                      | eGFR (CKD-EPI)*           | 0.98 (0.98-0.98) | < 0.001  |
| eGFR < 45 ml/min/1.73 m <sup>2</sup> | Older age at donation*    | 1.06 (1.05-1.08) | < 0.001  |
|                                      | Body mass index*          | 1.03 (1.01-1.06) | < 0.001  |
|                                      | Systolic blood pressure*  | 1.01 (1.01-1.02) | < 0.001  |
|                                      | Related to recipient      | 0.51 (0.38-0.69) | < 0.001  |
|                                      | eGFR (CKD-EPI)*           | 0.97 (0.96-0.97) | < 0.001  |
| eGFR < 30 ml/min/1.73 m <sup>2</sup> | Older age at donation*    | 1.08 (1.06-1.10) | < 0.001  |
|                                      | Body mass index*          | 1.09 (1.04-1.14) | < 0.001  |
| eGFR < 30 or ESRD                    | Older age at donation*    | 1.06 (1.05-1.08) | < 0.001  |
|                                      | Body mass index*          | 1.08 (1.04-1.13) | < 0.001  |
|                                      | Systolic blood pressure*  | 1.02 (1.00-1.03) | 0.03     |
|                                      | White race                | 0.42 (0.2-0.87)  | 0.02     |
| ESRD                                 | Body mass index*          | 1.1 (1.02-1.18)  | 0.01     |
|                                      | White race                | 0.25 (0.09-0.74) | 0.01     |

CI = confidence interval; CKD-EPI = Chronic Kidney Disease Epidemiology Collaboration equation; eGFR = estimated glomerular filtration rate; RRT = renal replacement therapy; SD = standard deviation

\*per increment of 1 unit, i.e., per year increment (for older age at donation), per kg/m<sup>2</sup> increment for body mass index; per mmHg increment for blood pressure; per ml/min/1.73m<sup>2</sup> increment for eGFR



**Table S1c.** Cumulative incidence of ESRD (per 10,000)

| Subgroup                 | 15 years           | 30 years             | 40 years              |
|--------------------------|--------------------|----------------------|-----------------------|
| All                      | 12.8<br>(4.8-34.1) | 77.4<br>(49.5-121.1) | 88.4<br>(56.5-138.2)  |
| Male                     | 7.5<br>(1-52.8)    | 94.5<br>(51-175)     | 107.5<br>(58-198.8)   |
| Female                   | 16.8<br>(5.4-52.1) | 64.5<br>(33.6-123.6) | 73.8<br>(38.5-141.4)  |
| White                    | 13.5<br>(5.1-35.9) | 68.7<br>(42.2-112)   | 78.7<br>(48.3-128.2)  |
| Non-white                | Inestimable        | 238.1<br>(77.4-720)  | 255.3<br>(83.1-770.6) |
| ≤ 50                     | 11.7<br>(3.8-36.2) | 73.9<br>(44.6-122.4) | 85.6<br>(51.7-141.6)  |
| > 50                     | 18<br>(2.5-126.8)  | 94.1<br>(35.4-248.8) | 100.6<br>(37.9-265.9) |
| Related to recipient     | 11.3<br>(3.6-34.9) | 88<br>(55.5-139.3)   | 103.3<br>(65.2-163.5) |
| Not related to recipient | 21.6<br>(3-152.5)  | 24.5<br>(3.5-172.7)  | 24.5<br>(3.5-172.9)   |

CI = confidence interval; eGFR = estimated glomerular filtration rate; ESRD = end-stage renal disease; SD = standard deviation

**Table S1d.** Postdonation events and risk of death, proteinuria, and eGFR < 30 ml/min/1.73 m<sup>2</sup> or ESRD

| Outcome           | Time-dependent covariate | Hazard ratio      | <i>P</i> |
|-------------------|--------------------------|-------------------|----------|
| Death             | Diabetes                 | 0.71 (0.46-1.08)  | 0.1131   |
|                   | New-onset hypertension   | 3.69 (2.88-4.73)  | <0.0001  |
|                   | Proteinuria              | 2.02 (1.28-3.2)   | 0.0025   |
|                   | eGFR < 60                | 4.41 (3.54-5.5)   | <0.0001  |
|                   | eGFR < 30                | 2.87 (1.89-4.35)  | <0.0001  |
|                   | eGFR < 30 or ESRD        | 3.38 (2.37-4.81)  | <0.0001  |
| Proteinuria       | Diabetes                 | 4.65 (3.28-6.59)  | <0.0001  |
|                   | New-onset hypertension   | 3.99 (2.62-6.07)  | <0.0001  |
|                   | eGFR < 60                | 3.93 (2.58-5.97)  | <0.0001  |
|                   | eGFR < 30                | 6.13 (2.95-12.73) | <0.0001  |
| eGFR < 30 or ESRD | Diabetes                 | 2.21 (1.32-3.69)  | 0.0026   |
|                   | New-onset hypertension   | 2.48 (1.38-4.46)  | 0.0023   |
|                   | Proteinuria              | 3.52 (1.76-7.04)  | 0.0004   |
|                   | eGFR < 60                | 3.89 (2.47-6.13)  | <0.0001  |
|                   | eGFR < 45                | 6.39 (3.96-10.31) | <0.0001  |

CI = confidence interval; eGFR = estimated glomerular filtration rate; ESRD = end-stage renal disease; RRT = renal replacement therapy

**Figure S2a.** Sample output for average white donor

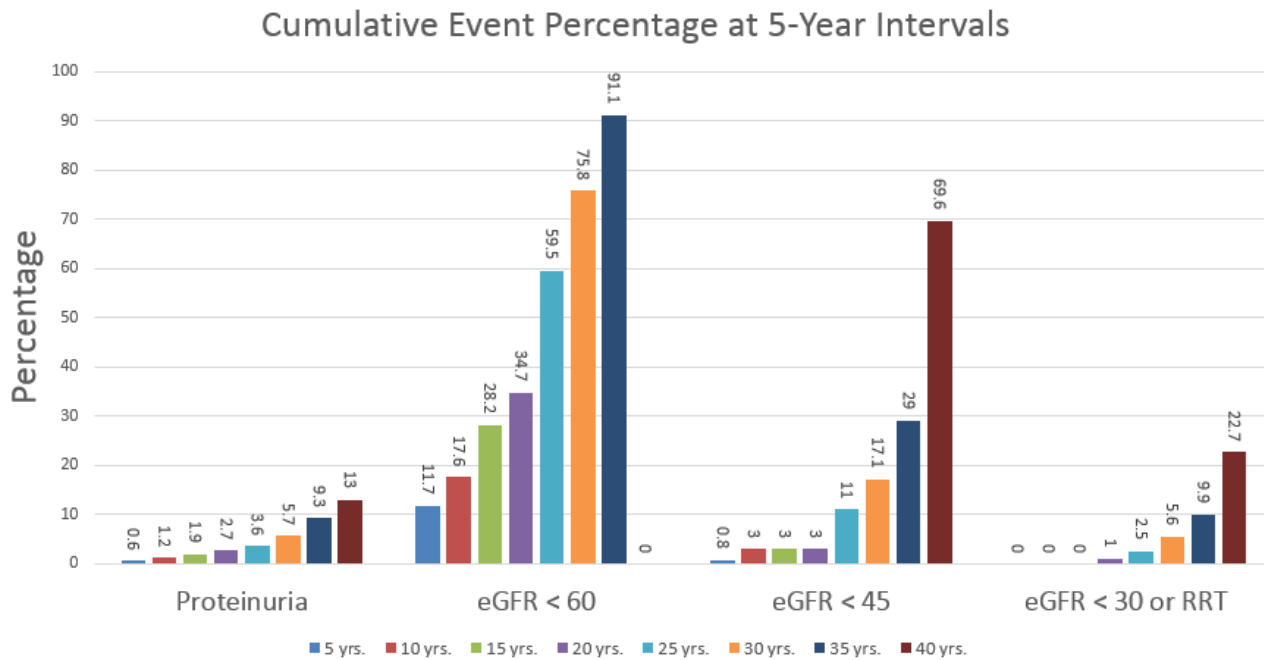

Figure S2a. Sample output for average white donor (i.e., a 40-year-old white female nonsmoker with an eGFR of 94 ml/min/1.73 m<sup>2</sup>; serum glucose, 93 mg/dL; body mass index, 26 kg/m<sup>2</sup>; baseline blood pressure, 120/73 mm Hg; and related to a recipient who does not have type 2 diabetes)

**Figure S2b.** Sample output for donor identical to that in Figure 1 except a 20-year-old woman whose recipient does have type 2 diabetes

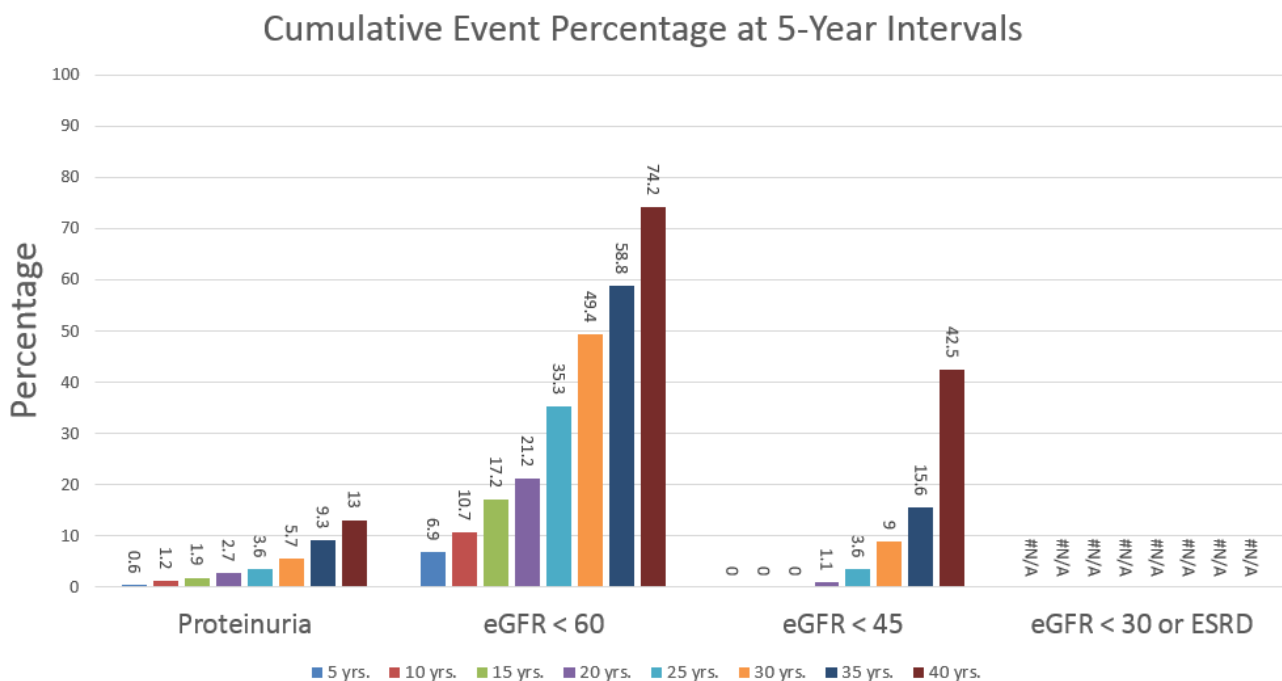

## Kidney donor follow-up survey

### 1. Did a doctor ever tell you that you have or had any of the following health conditions?

(Check one box on each line)

|                                                               | Yes<br>▼                   | No<br>▼                    | Approximate<br>Date |
|---------------------------------------------------------------|----------------------------|----------------------------|---------------------|
| a. Decreased kidney function.....                             | 1 <input type="checkbox"/> | 2 <input type="checkbox"/> | _____               |
| b. Hypertension (high blood pressure) treated with medication | 1 <input type="checkbox"/> | 2 <input type="checkbox"/> | _____               |
| c. High cholesterol treated with medication.....              | 1 <input type="checkbox"/> | 2 <input type="checkbox"/> | _____               |
| d. High cholesterol treated with diet.....                    | 1 <input type="checkbox"/> | 2 <input type="checkbox"/> | _____               |
| e. Stroke (cerebrovascular accident or CVA).....              | 1 <input type="checkbox"/> | 2 <input type="checkbox"/> | _____               |
| f. Transient ischemic attack (TIA).....                       | 1 <input type="checkbox"/> | 2 <input type="checkbox"/> | _____               |
| g. Blood in your urine (hematuria).....                       | 1 <input type="checkbox"/> | 2 <input type="checkbox"/> | _____               |
| h. Protein in your urine (proteinuria).....                   | 1 <input type="checkbox"/> | 2 <input type="checkbox"/> | _____               |
| i. Bowel obstruction.....                                     | 1 <input type="checkbox"/> | 2 <input type="checkbox"/> | _____               |
| j. Anemia (low red blood count).....                          | 1 <input type="checkbox"/> | 2 <input type="checkbox"/> | _____               |
| k. Heart Failure (congestive heart disease).....              | 1 <input type="checkbox"/> | 2 <input type="checkbox"/> | _____               |
| l. Heart Attack (myocardial infarction).....                  | 1 <input type="checkbox"/> | 2 <input type="checkbox"/> | _____               |
| m. Coronary Artery Disease/Angina (chest pain).....           | 1 <input type="checkbox"/> | 2 <input type="checkbox"/> | _____               |

If Yes, treatment (Check all that apply)

1  None      2  Medication      3  Bypass surgery      4  Balloon angioplasty

n. Cancer..... 1  ..... 2  \_\_\_\_\_

If Yes, describe where \_\_\_\_\_

o. Diabetes..... 1  ..... 2  \_\_\_\_\_

If Yes, treatment (Check all that apply) 1  Diet      2  Oral Pill      3  Insulin

### 2. Do or did any first degree relatives (meaning parents, siblings and children) have diabetes?

(Check one) 1  Yes      2  No      3  Unknown

### 3. Which choice below describes your current cigarette smoking activity? (Check best choice)

1  Every day      2  Some days      3  Used to smoke but currently not smoking

4  Never smoked more than 100 cigarettes in my lifetime      5  Never

If yes, Year Started \_\_\_\_\_ Year Stopped \_\_\_\_\_

### 4. WOMEN ONLY: Have you ever been pregnant?

(Check one) 1  Yes      2  No      If yes, please fill out pregnancy survey included.

**Table S2.** Characteristics at donation: development and validation cohorts

| Variable                                      | % or mean (SD)     |                            |                        | <i>P</i><br>split cohort 1 vs. 2 |
|-----------------------------------------------|--------------------|----------------------------|------------------------|----------------------------------|
|                                               | All<br>(n = 3,956) | Development (n =<br>1,978) | Validation (n = 1,978) |                                  |
| Age, years                                    | 39.3 (11.6)        | 39.2 (11.5)                | 39.3 (11.8)            | 0.71                             |
| Related to recipient                          | 80.3               | 81.9                       | 78.7                   | 0.01                             |
| Female gender                                 | 56.7               | 57.2                       | 56.3                   | 0.54                             |
| Smoker                                        | 30.3               | 31.1                       | 29.5                   | 0.28                             |
| Body mass index, kg/m <sup>2</sup>            | 25.8 (4.3)         | 25.8 (4.3)                 | 25.9 (4.3)             | 0.56                             |
| Body mass index ≥ 30<br>kg/m <sup>2</sup>     | 16.5               | 16.8                       | 16.2                   | 0.63                             |
| Serum creatinine,<br>mg/dL                    | 0.9 (0.2)          | 0.9 (0.2)                  | 0.9 (0.2)              | 0.57                             |
| eGFR (CKD-EPI),<br>ml/min/1.73 m <sup>2</sup> | 92.9 (16.2)        | 92.6 (16.1)                | 93.1 (16.2)            | 0.31                             |
| Serum glucose, mg/dL                          | 93.4 (14.8)        | 93.1 (14.5)                | 93.7 (15.1)            | 0.21                             |
| Systolic blood pressure,<br>mm Hg             | 120.0 (13.1)       | 119.7 (13.1)               | 120.3 (13.2)           | 0.14                             |
| Diastolic blood<br>pressure, mm Hg            | 73.4 (10.0)        | 73.3 (10.1)                | 73.6 (9.9)             | 0.38                             |
| Hemoglobin, g/dL                              | 14.1 (1.3)         | 14.1 (1.3)                 | 14.1 (1.3)             | 0.33                             |
| Recipient kidney<br>disease                   |                    |                            |                        |                                  |
| <i>Glomerulonephritis</i>                     | 24.0               | 23.7                       | 24.3                   |                                  |
| <i>Type 2 diabetes</i>                        | 3.8                | 3.8                        | 3.8                    | 0.92                             |
| <i>Other</i>                                  | 72.2               | 72.5                       | 71.9                   |                                  |

CKD-EPI = Chronic Kidney Disease Epidemiology Collaboration equation; eGFR = estimated glomerular filtration rate; SD = standard deviation
